# Supplementary material for: Quantitative 1H-NMR-Metabolomics Reveals Extensive Metabolic Reprogramming and the Effect of the Aquaglyceroporin FPS1 in Ethanol-Stressed Yeast Cells
Source: PLoS One. 2013 Feb 8;8(2):e55439. doi: 10.1371/journal.pone.0055439 (PMC3568136; doi:10.1371/journal.pone.0055439)
Supplement: Table S1 — Metabolites identified in the endo-metabolome data. (XLSX) [file pone.0055439.s003.xlsx]

## Sheet: Table S1
Table S1. Metabolites identified in the endo-metabolome data.
Metabolite	Chemical shift (ppm) and multiplicity of a characteristic peak	Spectral data	Supplementation
2-Isopropylmalate	0.856 (doublet)	1D, J-Res and TOCSY	Yes
L-leucine	0.965 (doublet)	1D, J-Res, HSQC and TOCSY	Yes
L-valine	0.996 (doublet)	1D, J-Res, HSQC and TOCSY	Yes
L-threonine	1.334 (doublet)	1D, J-Res, HSQC and TOCSY	Yes
L-alanine	1.485 (doublet)	1D, J-Res, HSQC and TOCSY	Yes
L-arginine	1.654 (multiplet)	1D, J-Res and TOCSY	Yes
Acetic acid *	1.920 (singlet)	1D, J-Res and HSQC	Yes
L-methionine	2.141 (singlet)	1D, J-Res, HSQC and TOCSY	Yes
L-glutamic acid	2.357 (multiplet)	1D, J-Res, HSQC and TOCSY	Yes
Pyruvic acid *,**	2.374 (singlet)	1D and J-Res	Yes
Malic acid	2.398 (doublet of doublets)	1D, J-Res and TOCSY	Yes
Succinic acid	2.408 (singlet)	1D and J-Res	Yes
L-glutamine	2.458 (multiplet)	1D, J-Res, HSQC and TOCSY	Yes
L-aspartic acid	2.678 (doublet of doublets)	1D, J-Res, HSQC and TOCSY	Yes
Citric acid	2.678 (doublet)	1D and J-Res	Yes
L-asparagine	2.865 (doublet of doublets)	1D, J-Res, HSQC and TOCSY	Yes
L-lysine	3.030 (triplet)	1D, J-Res, HSQC and TOCSY	Yes
L-ornithine	3.059 (triplet)	1D, J-Res, HSQC and TOCSY	Yes
Oxidized glutathione	3.313 (doublet of doublets)	1D, J-Res and TOCSY	Yes
L-proline	3.357 (doublet of triplets)	1D and J-Res	Yes
Glycerol	3.562 (multiplet)	1D, J-Res and TOCSY	Yes
L-glycine***	3.566 (singlet)	1D and J-Res	Yes
L-serine	3.962 (multiplet)	1D, J-Res and TOCSY	Yes
Reduced glutathione	4.577 (quartet)	1D, J-Res and TOCSY	Yes
Trehalose	5.200 (doublet)	1D, J-Res, HSQC and TOCSY	Yes
Glucose	5.238 (doublet)	1D, J-Res, HSQC and TOCSY	Yes
Thiamine	5.455 (singlet)	1D	Yes
Orotidine	5.559 (doublet)	1D, J-Res and TOCSY	No
UDP-glucose	5.610 (doublet of doublets)	1D	Yes
Fumaric acid	6.522 (singlet)	1D	Yes
L-tyrosine	6.905 (multiplet)	1D and TOCSY	Yes
NADH	6.950 (doublet)	1D	Yes
L-histidine	7.119 (doublet)	1D, J-Res, HSQC and TOCSY	Yes
L-phenylalanine	7.335 (doublet)	1D	Yes
Formic acid*	8.460 (singlet)	1D	Yes
ADP	8.539 (singlet)	1D	Yes
ATP	8.543 (singlet)	1D	Yes
AMP	8.601 (singlet)	1D	Yes
NADP+	9.301 (singlet)	1D	Yes
NAD+	9.343 (singlet)	1D	Yes
*volatile
**masked by L-glutamic acid in 1D spectra
***masked by glycerol peaks in 1D spectra of the Dfps1 deletion mutant
