# Supplementary material for: Quantitative 1H-NMR-Metabolomics Reveals Extensive Metabolic Reprogramming and the Effect of the Aquaglyceroporin FPS1 in Ethanol-Stressed Yeast Cells
Source: PLoS One. 2013 Feb 8;8(2):e55439. doi: 10.1371/journal.pone.0055439 (PMC3568136; doi:10.1371/journal.pone.0055439)
Supplement: Table S2 — Metabolites identified in the exo-metabolome data. (XLSX) [file pone.0055439.s004.xlsx]

## Sheet: Table S2
Table S2. Metabolites identified in the exo-metabolome data.
Metabolite	Chemical shift (ppm) and multiplicity of a characteristic peak	Spectral data	Supplementation
Ethanol*	1.188 (triplet)	1D and J-Res	Yes
Lactic acid	1.334 (doublet)	1D and J-Res	Yes
L-alanine	1.485 (doublet)	1D and J-Res	Yes
L-leucine	1.721 (multiplet)	1D and J-Res	Yes
Acetic acid	1.920 (singlet)	1D	Yes
L-methionine	2.141 (singlet)	1D and J-Res	Yes
Acetoin	2.231 (singlet)	1D and J-Res	Yes
Acetaldehyde	2.248 (doublet)	1D and J-Res	No
Pyruvic acid	2.374 (singlet)	1D and J-Res	Yes
Succinic acid	2.408 (singlet)	1D and J-Res	Yes
2-oxoglutaric acid	2.444 (triplet)	1D and J-Res	Yes
Glycerol	3.562 (multiplet)	1D and J-Res	Yes
Glucose	5.238 (doublet)	1D and J-Res	Yes
Fumaric acid	6.522 (singlet)	1D	Yes
Orotic acid	6.197 (singlet)	1D	Yes
Uracil	7.545 (doublet)	1D and J-Res	Yes
L-histidine	7.119 (doublet)	1D and J-Res	Yes
Formic acid	8.460 (singlet)	1D	Yes
*only considered in the absence of exogenous added ethanol to the growth medium
