# Supplementary material for: Quantitative 1H-NMR-Metabolomics Reveals Extensive Metabolic Reprogramming and the Effect of the Aquaglyceroporin FPS1 in Ethanol-Stressed Yeast Cells
Source: PLoS One. 2013 Feb 8;8(2):e55439. doi: 10.1371/journal.pone.0055439 (PMC3568136; doi:10.1371/journal.pone.0055439)
Supplement: Table S5 — O-PLS-DA modelling of the endo-metabolome of BY4741 parental strain in the presence of different ethanol concentrations. (XLSX) [file pone.0055439.s007.xlsx]

## Sheet: Table S5
Table S5. O-PLS-DA modelling of the endo-metabolome of BY4741 parental strain in the presence of different ethanol concentrations.
Pair-wise comparison	Number of components	R2X	R2Y	Q2
0 % v/v vs. 2 % v/v	1 + 0 + 0	0.809	0.960	0.950
2 % v/v vs. 4 % v/v	1 + 0 + 0	0.766	0.973	0.967
4 % v/v vs. 6 % v/v	1 + 0 + 0	0.762	0.985	0.982
0 % v/v vs. 4 % v/v	1 + 0 + 0	0.905	0.990	0.988
0 % v/v vs. 6 % v/v	1 + 0 + 0	0.940	0.993	0.991
Summary of the statistics of the O-PLS-DA models for the pair-wise comparison of the metabolic profiles of nonstressed (0 % v/v) and ethanol-adapted cells harvested in the exponential phase of growth in medium supplemented with 2, 4 and 6 % v/v. Number of components (Principal components + Orthogonal components + Uncorrelated components).
