# Supplementary material for: Quantitative 1H-NMR-Metabolomics Reveals Extensive Metabolic Reprogramming and the Effect of the Aquaglyceroporin FPS1 in Ethanol-Stressed Yeast Cells
Source: PLoS One. 2013 Feb 8;8(2):e55439. doi: 10.1371/journal.pone.0055439 (PMC3568136; doi:10.1371/journal.pone.0055439)
Supplement: Table S6 — Exo-metabolome data. (XLSX) [file pone.0055439.s008.xlsx]

## Sheet: Table S6
Table S6. Exo-metabolome data.
	Parental strain (wt)								fps1D deletion mutant
	Ethanol concentration (% v/v)
	0		0.02		0.04		0.06		0		0.02
Metabolites	Average	Standard deviation	Average	Standard deviation	Average	Standard deviation	Average	Standard deviation	Average	Standard deviation	Average	Standard deviation
L-leucine	35.522	2.58008	20.8741	1.548	25.2845	0.531137	20.4521	4.57194	22.3825	2.49958	24.8823	3.22881
L-methionine	12.4181	1.41732	6.92387	0.582842	6.35262	0.617544	8.4338	2.10875	6.37068	0.997635	8.87169	1.14796
L-alanine	2.24118	0.093862	3.18077	0.166695	3.02193	0.238649	3.17949	0.350549	2.62516	0.20392	3.21237	0.232805
L-histidine	11.3245	0.640145	10.7	0.537496	10.5824	0.196212	10.9312	0.509947	10.24	0.895295	11.3396	0.300422
Uracil	13.8293	0.318903	13.5711	0.531152	13.6101	0.36006	15.2777	0.499753	12.5773	1.05793	13.9029	0.330662
Lactic acid	13.3206	0.819295	30.4137	3.91054	37.9008	2.85434	34.4603	5.38047	11.7294	0.43226	26.6434	1.33956
Acetic acid	74.4289	5.37624	98.6804	8.82047	127.333	4.56537	147.866	19.0047	99.6777	4.51457	98.2646	10.7708
Pyruvic acid	18.9906	0.514617	27.8171	1.62897	37.3554	0.379577	41.0351	6.88403	18.7881	0.725357	25.2288	2.69764
Fumaric acid	0.370753	0.127119	0.501698	0.0985357	0.601967	0.0722766	0.529655	0.109381	1.18047	0.0644332	0.936984	0.0843237
Succinic acid	1.92481	0.932309	1.35464	0.14824	1.31278	0.240301	0.844971	0.343436	3.08597	0.372197	1.61638	0.112517
2-oxoglutaric acid	5.52986	0.300992	5.40713	0.520494	3.23309	0.61737	2.44281	0.920645	5.4528	0.490898	4.40255	0.629709
Orotic acid	0.797823	0.132246	0.827895	0.176978	0.808666	0.136439	0.260018	0.1261	2.30282	0.262878	1.73254	0.326715
Formic acid	4.05468	0.648863	3.58689	0.51232	3.58175	0.506871	3.95508	0.425851	3.38218	0.539794	3.79082	0.194691
Acetoin	1.28047	0.230317	4.83715	0.581395	7.24883	0.354492	7.76786	1.60213	0.853963	0.124649	3.68858	0.251124
Acetaldehyde	7.8747	0.875145	32.271	4.02154	47.5259	3.24228	47.3712	4.10598	5.15288	0.630159	26.3162	1.03486
Ethanol	3326.4	101.837	-	-	-	-	-	-	4103.52	226.946	-	-
Glycerol	253.06	21.5667	188.76	18.2389	215.275	20.3682	243.227	27.4013	200.555	12.6447	111.304	12.6227
Glucose	3659.81	136.13	3505.04	145.036	3404.89	84.7956	3438.82	128.037	3553.78	257.554	3678.82	57.7745
Relative abundance of the metabolites (characteristic bins) identified in the exo-metabolome of S. cerevisiae BY4741 and fps1D deletion mutant during the exponential growth phase (OD600nm = 1) in the presence of different ethanol concentrations (0, 2, 4 and 6 % v/v). Experimental values are means of four independent experiments with standard deviation error bars.
