# Supplementary material for: Quantitative 1H-NMR-Metabolomics Reveals Extensive Metabolic Reprogramming and the Effect of the Aquaglyceroporin FPS1 in Ethanol-Stressed Yeast Cells
Source: PLoS One. 2013 Feb 8;8(2):e55439. doi: 10.1371/journal.pone.0055439 (PMC3568136; doi:10.1371/journal.pone.0055439)
Supplement: Table S7 — Metabolite analysis of the exo-metabolome of BY4741 parental strain. (XLSX) [file pone.0055439.s009.xlsx]

## Sheet: Table S7
Table S7. Metabolite analysis of the exo-metabolome of BY4741 parental strain.
	Parental strain (wt)
	0 % vs 2 %		2 % vs 4 %		4 % vs 6 %		0 % vs 4 %		0 % vs 6 %
Metabolites	Fold change 2 % / 0 %	T-test	Fold change 4 % / 2 %	T-test	Fold change 6 % / 4 %	T-test	Fold change 4 % / 0 %	T-test	Fold change 6 % / 0 %	T-test
L-leucine	0.587637	0.000419584	1.21129	0.0115068	0.808878	0.164149	0.711798	0.00515473	0.575758	0.00487952
L-methionine	0.557563	0.00346074	0.917496	0.288308	1.32761	0.186069	0.511562	0.00223998	0.679155	0.0398889
L-alanine	1.41924	0.000484319	0.950062	0.385198	1.05214	0.546743	1.34837	0.00661846	1.41867	0.0155589
L-histidine	0.944856	0.244595	0.98901	0.740817	1.03296	0.332891	0.934473	0.136099	0.965268	0.438589
Uracil	0.981326	0.503178	1.00288	0.919973	1.12253	0.004313	0.984149	0.460345	1.10473	0.00789788
Lactic acid	2.28321	0.00379291	1.24617	0.039957	0.909225	0.37685	2.84527	0.000316131	2.58699	0.0058028
Acetic acid	1.32584	0.00983593	1.29036	0.00549084	1.16125	0.156824	1.7108	1.55969e-05	1.98668	0.00477552
Pyruvic acid	1.46479	0.00139437	1.34289	0.00141119	1.09851	0.423071	1.96705	1.55705e-08	2.16082	0.011308
Fumaric acid	1.35319	0.21111	1.19986	0.209365	0.879875	0.381682	1.62364	0.043091	1.4286	0.152966
Succinic acid	0.703779	0.36901	0.969096	0.807566	0.643652	0.107078	0.682029	0.342712	0.438989	0.13666
2-oxoglutaric acid	0.977806	0.738654	0.597931	0.00371803	0.755564	0.269332	0.58466	0.00339733	0.441748	0.00693122
Orotic acid	1.03769	0.822075	0.976774	0.886712	0.32154	0.00222952	1.01359	0.924492	0.325909	0.0022413
Formic acid	0.88463	0.366857	0.998568	0.990549	1.10423	0.367484	0.883363	0.360365	0.975437	0.832609
Acetoin	3.77762	0.000658882	1.49858	0.00172013	1.0716	0.618757	5.66106	1.58504e-06	6.0664	0.00536988
Acetaldehyde	4.09806	0.00131838	1.47271	0.00249335	0.996746	0.960913	6.03526	0.000103794	6.01562	0.000302795
Glycerol	0.745911	0.00802293	1.14047	0.144611	1.12984	0.209911	0.850689	0.0696546	0.961143	0.643509
Glucose	0.95771	0.226605	0.971427	0.350682	1.00996	0.7171	0.930346	0.0399629	0.939616	0.0866325
Metabolite analysis of the exo-metabolome of S. cerevisiae BY4741 during the exponential growth phase (OD600nm = 1) in the presence of different ethanol concentrations (0, 2, 4 and 6 % v/v). Experimental values are means of four independent experiments with standard deviation error bars. Color key: green corresponds to a fold change higher than 1 with a T-test < 0.05; light green corresponds to a…
