# Supplementary material for: Quantitative 1H-NMR-Metabolomics Reveals Extensive Metabolic Reprogramming and the Effect of the Aquaglyceroporin FPS1 in Ethanol-Stressed Yeast Cells
Source: PLoS One. 2013 Feb 8;8(2):e55439. doi: 10.1371/journal.pone.0055439 (PMC3568136; doi:10.1371/journal.pone.0055439)
Supplement: Table S9 — Metabolite analysis of the endo-metabolome of fps1Δ deletion mutant strain. (XLSX) [file pone.0055439.s011.xlsx]

## Sheet: Table S9
Table S9. Metabolite analysis of the endo-metabolome of fps1D deletion mutant strain.
	fps1D deletion mutant
	0 % vs 2 %
Metabolites	Fold change 2% / 0%	T-test
Isopropylmatate	1.35387	0.271573
L-leucine	1.81175	0.000317992
L-methionine	1.44223	0.00244453
L-alanine	2.4277	0.000115523
L-valine	2.15397	0.000126596
L-glycine	-	-
L-serine	1.15356	0.00972595
L-threonine	1.30196	0.000103519
L-arginine	0.972809	0.41712
L-ornithine	2.49233	3.65618e-05
L-lysine	1.26087	0.00108343
L-glutamic acid	1.84811	3.51329e-06
L-glutamine	1.21424	0.0110873
L-aspartic acid	1.14202	0.000708944
L-asparagine	1.46811	0.000188975
L-histidine	1.35392	0.000188479
L-tyrosine	0.652648	0.000162271
L-pheylalanine	0.838223	0.00614698
L-proline	1.44178	0.022127
Succinic acid	0.857655	0.0351529
Malic acid	1.52613	0.000156209
Citric acid	0.907613	0.150679
Fumaric acid	0.625399	6.66118e-05
Red_Glutathione	0.817759	0.000277071
Oxid_Glutathione	1.25183	0.0344913
Trehalose	2.56883	0.000762357
Glucose	0.915611	0.269689
Orotidine	0.677104	0.00102307
Glycerol	0.830497	0.137294
NADH	1.98198	0.000174449
NAD+	0.990333	0.79211
NADP+	0.824968	0.0031149
ATP	1.14834	0.178025
ADP	1.02431	0.779205
AMP	1.60995	0.162898
Thiamine	2.00468	0.00158905
UDP-Glucose	0.859376	0.0247217
Metabolite analysis of the endo-metabolome of Dfps1 deletion mutant during the exponential growth phase (OD600nm = 1) in the presence of different ethanol concentrations (0 and 2 % v/v). Experimental values are means of six independent experiments with standard deviation error bars. Color key: green corresponds to a fold change higher than 1 with a T-test < 0.05; light green corresponds to a fold…
