# Supplementary material for: Quantitative 1H-NMR-Metabolomics Reveals Extensive Metabolic Reprogramming and the Effect of the Aquaglyceroporin FPS1 in Ethanol-Stressed Yeast Cells
Source: PLoS One. 2013 Feb 8;8(2):e55439. doi: 10.1371/journal.pone.0055439 (PMC3568136; doi:10.1371/journal.pone.0055439)
Supplement: Table S10 — Metabolite analysis of the endo-metabolome of the parental strain and of the fps1Δ deletion mutant. (XLSX) [file pone.0055439.s012.xlsx]

## Sheet: Table S10
Table S10. Metabolite analysis of the endo-metabolome of the parental strain and of the fps1D deletion mutant.
	Comparison between wt and fps1D
	0		0.02
Metabolites	Fold change fps1D / wt	T-test	Fold change fps1D / wt	T-test
Isopropylmatate	1.11309	0.587846	0.845408	0.45321
L-leucine	1.44737	0.000311375	1.04984	0.524482
L-methionine	1.51492	0.000396247	0.981925	0.823346
L-alanine	2.01148	3.5152e-05	1.17526	0.0500551
L-valine	1.34629	0.00419232	0.997956	0.978762
L-serine	1.12966	0.0106747	0.969129	0.609512
L-threonine	1.52224	7.16268e-05	1.07327	0.0701884
L-arginine	1.14205	0.0226448	1.12599	0.0600075
L-ornithine	0.763328	0.0466767	0.867274	0.209809
L-lysine	0.906429	0.20451	0.832132	0.0457225
L-glutamic acid	1.20472	0.0391528	0.915869	0.045371
L-glutamine	1.55832	0.000298721	0.971158	0.587841
L-aspartic acid	1.51629	0.00101245	0.987102	0.865469
L-asparagine	1.58602	0.000476895	1.08197	0.187526
L-histidine	1.02468	0.599636	1.24534	0.00254199
L-tyrosine	2.0445	1.45615e-08	1.41772	0.0300994
L-pheylalanine	1.96095	5.84864e-06	1.28817	0.0028547
L-proline	1.02135	0.831648	1.19245	0.159366
Succinic acid	2.41013	2.60376e-06	0.907233	0.12047
Malic acid	1.34536	0.0124288	0.889524	0.175069
Citric acid	2.07973	2.97632e-07	0.927802	0.352646
Fumaric acid	3.14822	7.59715e-08	1.25882	0.0323201
Red_Glutathione	1.20792	0.0126673	0.98355	0.819019
Oxid_Glutathione	0.849295	0.0758223	1.25041	0.0485497
Trehalose	0.25601	0.00239329	0.217721	0.104646
Glucose	0.70117	0.00967832	1.1173	0.22218
Orotidine	2.94536	1.6617e-07	1.48621	0.00839431
Glycerol	13.217	4.44933e-05	4.44031	0.000308712
NADH	1.13472	0.425037	1.03009	0.788114
NAD+	0.851993	0.000487625	0.920482	0.0172902
NADP+	0.871339	0.0052471	0.95283	0.443871
ATP	0.923765	0.237075	0.84422	0.279015
ADP	0.862566	0.0234283	0.745254	0.0228564
AMP	1.1557	0.578525	1.12852	0.680848
Thiamine	0.728507	0.00503734	0.903842	0.38954
UDP-Glucose	1.07084	0.27445	1.11775	0.216827
Metabolite analysis of the endo-metabolome of the parental strain (Wt) and of the Dfps1 deletion mutant during the exponential growth phase (OD600nm = 1) in the presence of different ethanol concentrations (0 and 2 % v/v). Experimental values are means of six independent experiments with standard deviation error bars. Color key: green corresponds to a fold change higher than 1 with a T-test < 0.0…
