# Supplementary material for: Quantitative 1H-NMR-Metabolomics Reveals Extensive Metabolic Reprogramming and the Effect of the Aquaglyceroporin FPS1 in Ethanol-Stressed Yeast Cells
Source: PLoS One. 2013 Feb 8;8(2):e55439. doi: 10.1371/journal.pone.0055439 (PMC3568136; doi:10.1371/journal.pone.0055439)
Supplement: Table S11 — Metabolite analysis of the exo-metabolome of fps1Δ deletion mutant strain. (XLSX) [file pone.0055439.s013.xlsx]

## Sheet: Table S11
Table S11 Metabolite analysis of the exo-metabolome of fps1D deletion mutant strain.
	fps1D deletion mutant
	0 % vs 2 %
Metabolites	Fold change 2 % / 0 %	T-test
L-leucine	1.11169	0.332214
L-methionine	1.39258	0.0298777
L-alanine	1.22369	0.0171123
L-histidine	1.10738	0.120277
Uracil	1.1054	0.115188
Lactic acid	2.27151	0.000105768
Acetic acid	0.985824	0.844191
Pyruvic acid	1.34281	0.0218337
Fumaric acid	0.793737	0.00839393
Succinic acid	0.523785	0.00425233
2-oxoglutaric acid	0.807393	0.0655398
Orotic acid	0.752356	0.0585626
Formic acid	1.12082	0.28878
Acetoin	4.31937	3.11829e-05
Acetaldehyde	5.1071	8.15723e-07
Glycerol	0.554978	0.000131388
Glucose	1.03518	0.467011
Metabolite analysis of the exo-metabolome of the Dfps1 deletion mutant during the exponential growth phase (OD600nm = 1) in the presence of different ethanol concentrations (0 and 2 % v/v). Experimental values are means of four independent experiments with standard deviation error bars. Color key: green corresponds to a fold change higher than 1 with a T-test < 0.05; light green corresponds to a …
