# Supplementary material for: Quantitative 1H-NMR-Metabolomics Reveals Extensive Metabolic Reprogramming and the Effect of the Aquaglyceroporin FPS1 in Ethanol-Stressed Yeast Cells
Source: PLoS One. 2013 Feb 8;8(2):e55439. doi: 10.1371/journal.pone.0055439 (PMC3568136; doi:10.1371/journal.pone.0055439)
Supplement: Table S12 — Metabolite analysis of the exo-metabolome of the parental strain and of the fps1Δ deletion mutant. (XLSX) [file pone.0055439.s014.xlsx]

## Sheet: Table S12
Table S12. Metabolite analysis of the exo-metabolome of the parental strain and of the fps1D deletion mutant.
	Comparison between wt and fps1D
	0		0.02
Metabolites	Fold change fps1D / wt	T-test	Fold change fps1D / wt	T-test
L-leucine	0.630101	0.000726598	1.19202	0.11942
L-methionine	0.513017	0.00137403	1.28132	0.0527957
L-alanine	1.17133	0.0388028	1.00993	0.855342
L-histidine	0.904238	0.143928	1.05978	0.135514
Uracil	0.909466	0.130338	1.02445	0.40024
Lactic acid	0.880543	0.0348195	0.876031	0.195097
Acetic acid	1.33923	0.000885588	0.995786	0.960484
Pyruvic acid	0.98934	0.708459	0.906952	0.214905
Fumaric acid	3.18399	0.000348709	1.86763	0.00123586
Succinic acid	1.60326	0.116867	1.19322	0.0536909
2-oxoglutaric acid	0.986064	0.825923	0.814212	0.0788584
Orotic acid	2.88637	0.000557393	2.0927	0.00991788
Formic acid	0.834144	0.21835	1.05685	0.555657
Acetoin	0.666912	0.0405421	0.762554	0.0338516
Acetaldehyde	0.654358	0.00589934	0.815477	0.0791304
Ethanol	1.23362	0.00504247	-	-
Glycerol	0.792521	0.0157875	0.589657	0.00141416
Glucose	0.971028	0.558679	1.04958	0.1274
Metabolite analysis of the exo-metabolome of the parental strain (Wt) and of the Dfps1 deletion mutant during the exponential growth phase (OD600nm = 1) in the presence of different ethanol concentrations (0 and 2 % v/v). Experimental values are means of four independent experiments with standard deviation error bars. Color key: green corresponds to a fold change higher than 1 with a T-test < 0.0…
